# Supplementary material
Source: MDPI journal article supplement (https://www.mdpi.com/2076-3417/14/4/1420)
Supplement: s1 [file s1]

## Supplementary Materials

**Table S1.** The MS/MS transitions and compounds' characteristic parameters for quantified compounds.

| Compound                     | Precursor ion<br>m/z | Main product ions<br>MS <sup>2</sup> m/z | Ionization<br>mode | DP, V | EP, V | CE, V | CXP, V |
|------------------------------|----------------------|------------------------------------------|--------------------|-------|-------|-------|--------|
| Quinic acid-1                | 190.9                | 84.9                                     | ESI -              | -75   | -10   | -28   | -7     |
| Quinic acid-2                | 190.9                | 93.0                                     | ESI -              | -75   | -10   | -30   | -5     |
| Gallic acid-1                | 168.9                | 124.8                                    | ESI -              | -40   | -10   | -20   | -7     |
| Gallic acid-2                | 168.9                | 78.9                                     | ESI -              | -40   | -10   | -28   | -7     |
| Rutin-1                      | 608.9                | 299.9                                    | ESI -              | -150  | -10   | -50   | -9     |
| Rutin-2                      | 608.9                | 270.9                                    | ESI -              | -150  | -10   | -82   | -9     |
| Quercetin-1                  | 300.9                | 151.0                                    | ESI -              | -90   | -10   | -30   | -7     |
| Quercetin-2                  | 300.9                | 179.0                                    | ESI -              | -90   | -10   | -26   | -7     |
| Vanillic acid-1              | 166.9                | 107.9                                    | ESI -              | -5    | -10   | -26   | -9     |
| Vanillic acid-2              | 166.9                | 123.0                                    | ESI -              | -5    | -10   | -16   | -7     |
| <i>trans</i> -Ferulic acid-1 | 192.9                | 133.9                                    | ESI -              | -60   | -10   | -24   | -7     |
| <i>trans</i> -Ferulic acid-2 | 192.9                | 178.0                                    | ESI -              | -60   | -10   | -18   | -7     |
| Apigenin-1                   | 268.9                | 117.0                                    | ESI -              | -90   | -10   | -52   | -9     |
| Apigenin-2                   | 268.9                | 150.9                                    | ESI -              | -90   | -10   | -34   | -7     |
| <i>trans</i> -Resveratrol 1  | 226.9                | 185.0                                    | ESI -              | -75   | -10   | -26   | -5     |
| <i>trans</i> -Resveratrol 2  | 226.9                | 143.0                                    | ESI -              | -75   | -10   | -36   | -7     |
| (+)-Catechin                 | 290.9                | 139.0                                    | ESI +              | 81    | 10    | 23    | 10     |
| (+)-Catechin                 | 290.9                | 123.0                                    | ESI +              | 81    | 10    | 47    | 10     |
| (-)-Epicatechin 3-gallate-1  | 306.9                | 288.8                                    | ESI +              | 71    | 10    | 21    | 10     |
| (-)-Epicatechin 3-gallate-2  | 306.9                | 163.0                                    | ESI +              | 71    | 10    | 11    | 12     |

Collision energy (CE), declustering potential (DP), entrance potential (EP), and collision cell exit potential (CXP).

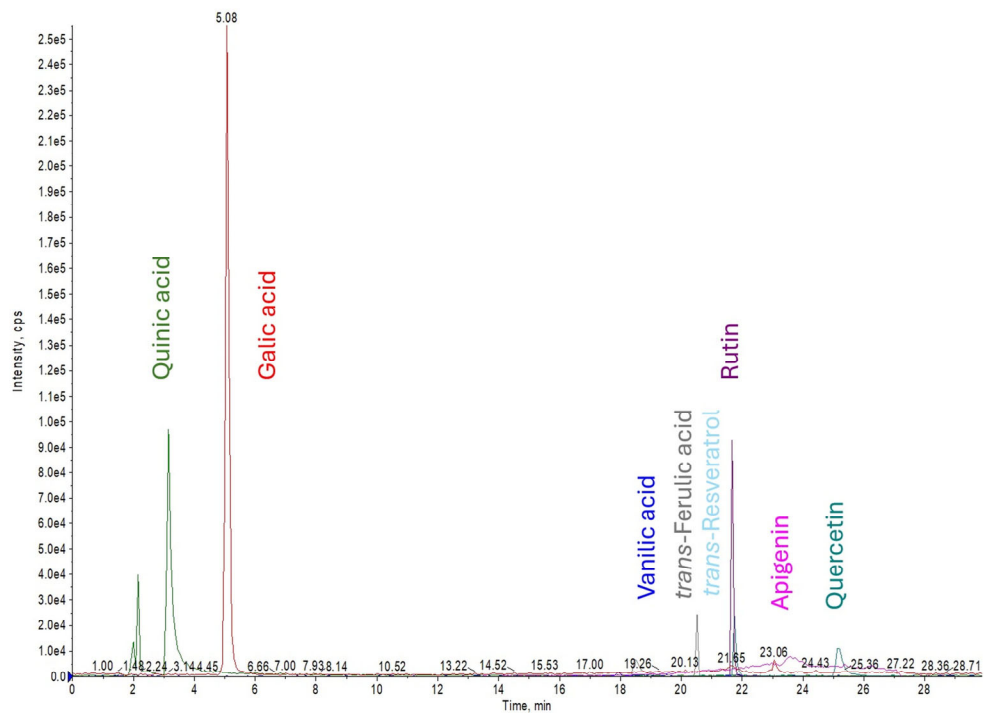

**Figure S1.** Extracted ion chromatograms (XIC) obtained for selected compounds in SurfE in negative ionization mode.

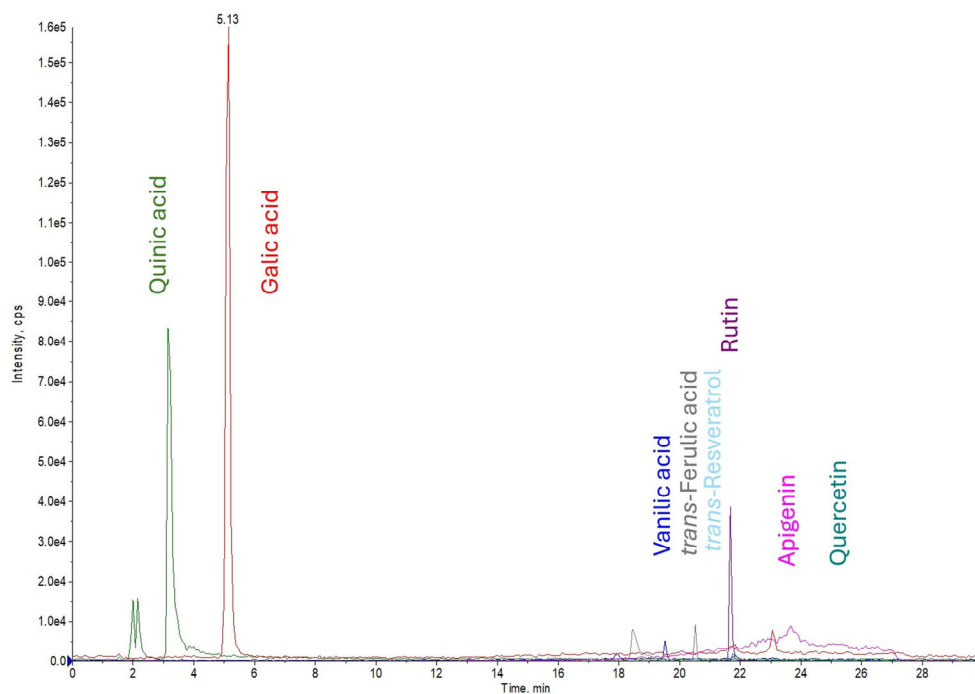

**Figure S2.** Extracted ion chromatograms (XIC) obtained for selected compounds in SolvE in negative ionization mode.
